# Supplementary material for: Polymer grafted graphitic carbon nitrides as precursors for reinforced lubricant hydrogels
Source: Royal Society of Chemistry journal article supplement (doi:10.1039/c9py00505f), 2019-01-01
Supplement: c9py00505f1.pdf [file c9py00505f1.pdf]

## Supporting Information

### Polymer Grafted Graphitic Carbon Nitride as Precursors for Reinforced Lubricant Hydrogels

*Baris Kumru,<sup>‡</sup> Valerio Molinari,<sup>‡</sup> Markus Hilgart,<sup>†</sup> Florian Rummel,<sup>†</sup> Michael Schäffler,<sup>†</sup> Bernhard V.K.J. Schmidt<sup>‡,\*</sup>*

<sup>‡</sup> Max-Planck Institute of Colloids and Interfaces, Department of Colloid Chemistry, Am Mühlenberg 1, 14476 Potsdam, Germany

<sup>†</sup> Anton Paar Germany GmbH, Hellmuth-Hirth-Strasse 6, 73760 Ostfildern, Germany

\*(BVKJS) Tel (+49) 331 567 9509; Fax (+49) 331 567 9502

Email [bernhard.schmidt@mpikg.mpg.de](mailto:bernhard.schmidt@mpikg.mpg.de)

#### Experimental:

**Preparation of g-CN:**<sup>1</sup> 2.0 g of cyanuric acid (C) and 2.0 g of melamine (M) were mixed with 40 mL distilled water and shaken overnight. The mixture was centrifuged at 6000 rpm for 10 minutes and the precipitate dried at 60 °C under vacuum overnight. The dried product was transferred into a capped crucible and put into N<sub>2</sub> protected oven at 550 °C for 4 hours, with a heating rate of 2.3 °C /min<sup>-1</sup>. The product is obtained as yellow solid. g-CN must be well grinded prior to use.

**Synthesis of Tough DMA Hydrogels (touB):** 1 g g-CN pre3h was added to 1 g water, 1 g DMA, 100 mg MBA and mixed for 10 minutes. Subsequently, the mixture was flushed with

nitrogen for 3 minutes and the mixture was put between two 50 W LED daylight sources (20 cm apart from each other) to initiate gelation which takes place in 1 hour. EG (14 wt.%) can be removed via washing with water as described in the manuscript.

**Synthesis of Tough DMA Hydrogels (touC):** 1 g g-CN pre3h was added to with 2 g water, 1 g DMA, 100 mg MBA and mixed for 10 minutes. Subsequently, the mixture was flushed with nitrogen for 3 minutes and the mixture was put between two 50 W LED daylight sources (20 cm apart from each other) to initiate gelation which takes place in 1 hour. EG (10 wt.%) can be removed via washing with water as described in the manuscript.

**Reference DMA Hydrogel Without g-CN (touRef):** Mixture composed of 450 mg EG, 450 mg water and 80 mg DMA was used to replicate the g-CN based prepolymer. The EG/water/DMA solution was added to with 1 g water, 2 g DMA, 100 mg MBA, 20 mg ascorbic acid and mixed for 10 minutes. 0.2 mL H<sub>2</sub>O<sub>2</sub> solution was added to the mixture and gelation took place in 10 minutes. EG (10 wt.%) can be removed via washing with water as described in manuscript.

**Synthesis of Reference DMA Hydrogel For Lubricant Hydrogels (lubB):** 1 g g-CN pre3h was added to 2 g water, 1.8 g DMA, 75 mg MBA and mixed for 10 minutes. Subsequently, the mixture was flushed with nitrogen for 3 minutes and the mixture was put between two 50 W LED daylight sources (20 cm apart from each other) to initiate gelation which takes place in 1 hour. EG can be removed via washing with water as described in the manuscript.

**Synthesis of Reference SPMA Hydrogel For Lubricant Hydrogels (lubC):** 1 g g-CN pre3h was added to 2 g water, 1.2 g SPMA, 75 mg MBA and mixed well for 10 minutes. Subsequently, the mixture was flushed with nitrogen for 3 minutes and the mixture was put between two 50 W LED daylight sources (20 cm apart from each other) to initiate gelation which takes place in 1 hour. EG can be removed via washing with water as described in the manuscript.

**Reference Lubricant Hydrogels Without g-CN (lubRef):** Mixture composed of 450 mg EG, 450 mg water and 80 mg DMA was used to replicate the content of g-CN based prepolymer. The EG/water/DMA solution was added to 2 g water, 1 g DMA, 0.8 g SPMA, 75 mg MBA, 20 mg ascorbic acid and mixed for 10 minutes. 0.2 mL H<sub>2</sub>O<sub>2</sub> solution was added to initiate gelation

which takes place in 1 hour. EG can be removed via washing with water as described in the manuscript.

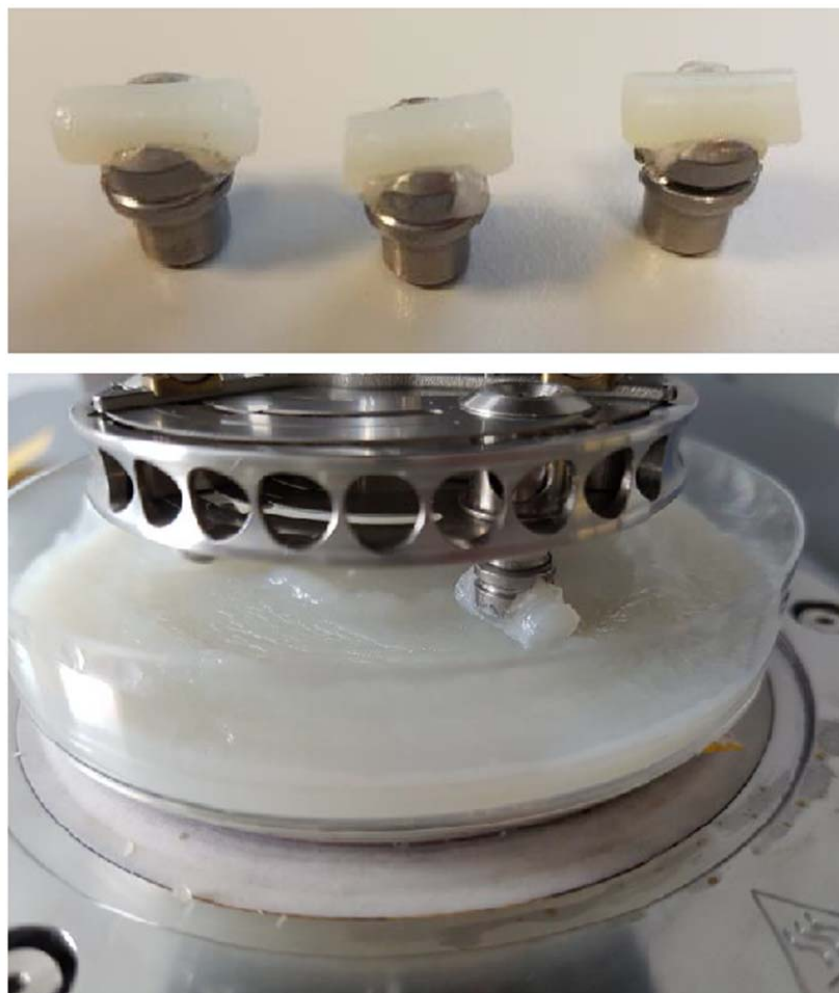

**Figure S1.** Digital image of MCR Tribometer set-up for tribological measurement, 3 cylindrical hydrogel samples were clamped to a T-PID/44 holder (top) and slid over a hydrogel sample prepared in a petri dish (below).

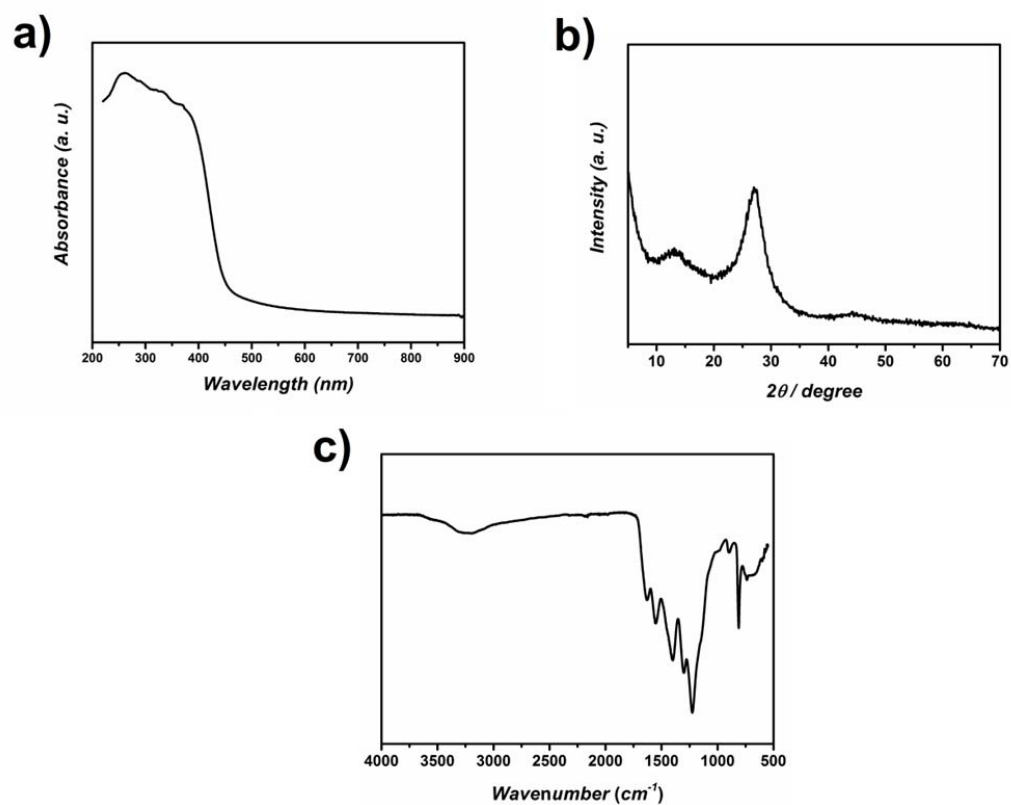

**Figure S2.** a) UV-Vis spectrum, b) powder XRD profile and c) FT-IR results of synthesized g-CN.

**Table S1.** Surface zeta potential and C:N ratio of synthesized g-CN.

|             | Surface zeta potential (mV) | C:N ratio |
|-------------|-----------------------------|-----------|
| <b>g-CN</b> | -30.6                       | 0.6110    |

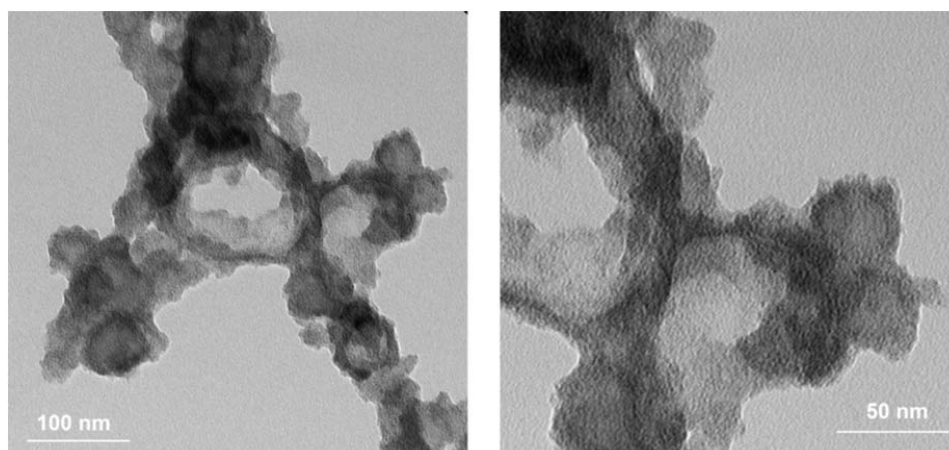

**Figure S3.** TEM images of g-CN pre3h.

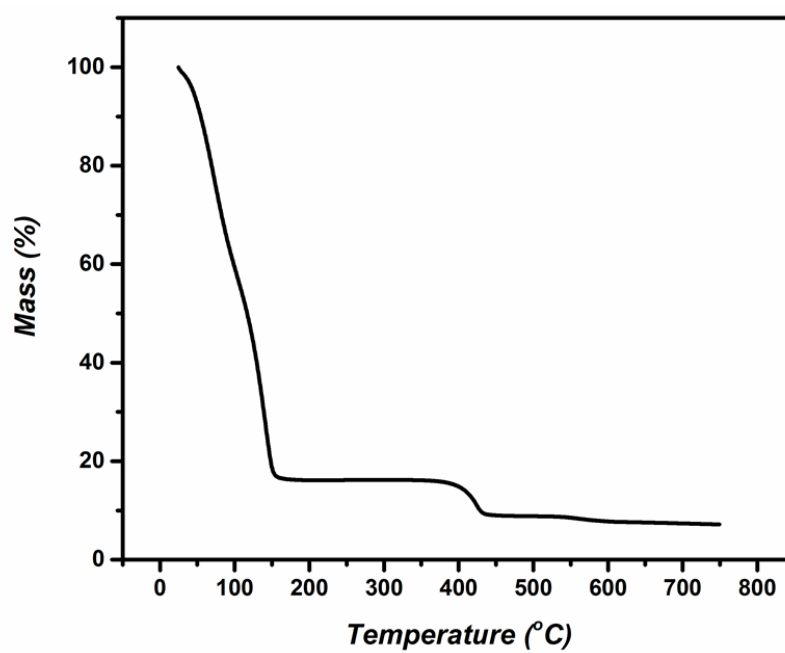

**Figure S4.** TGA diagram of g-CN pre3h.

**Table S2.** Surface zeta potential and C:N ratio of isolated particles from g-CN pre3h.

|                              | Surface zeta potential (mV) | C:N ratio |
|------------------------------|-----------------------------|-----------|
| g-CN pre3h (isolated powder) | -33.2                       | 1.748     |

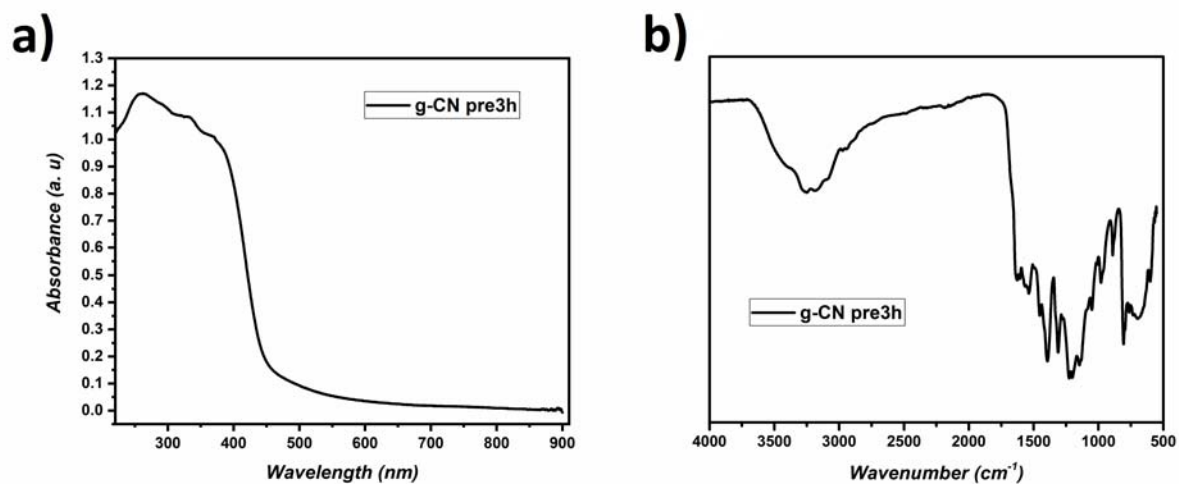

**Figure S5.** a) Solid state UV-Vis and b) FT-IR spectra of isolated powders from g-CN pre3h precursor.

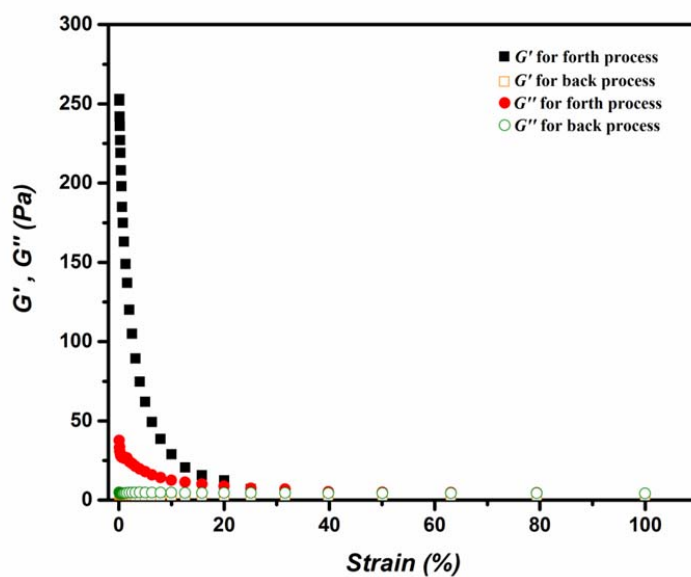

**Figure S6.** Rheology result of g-CN pre1h, storage ( $G'$ , black and orange squares) and loss modulus ( $G''$ , red and green circles) against strain, back (open) and forth (filled) process.

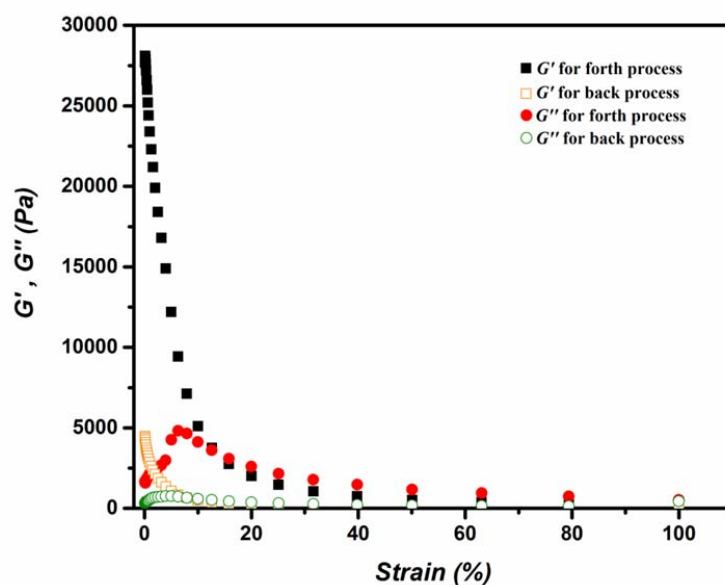

**Figure S7.** Rheology result of g-CN pre6h, storage ( $G'$ , black and orange squares) and loss modulus ( $G''$ , red and green circles) against strain, back (open) and forth (filled) process.

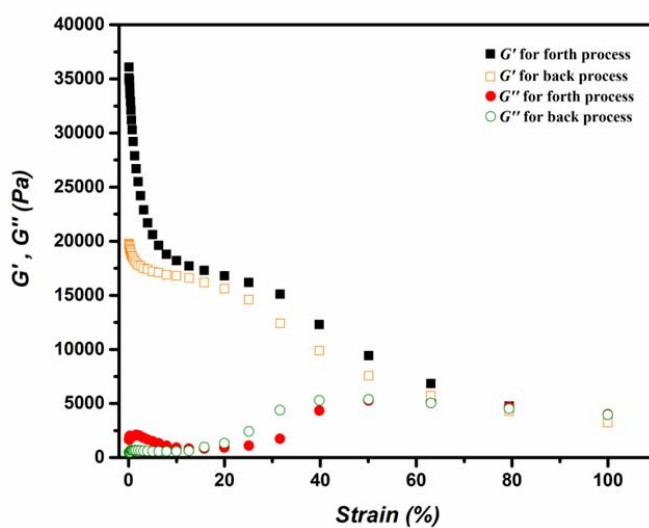

**Figure S8.** Rheology result of g-CN pre12h, storage ( $G'$ , black and orange squares) and loss modulus ( $G''$ , red and green circles) against strain, back (open) and forth (filled) process.

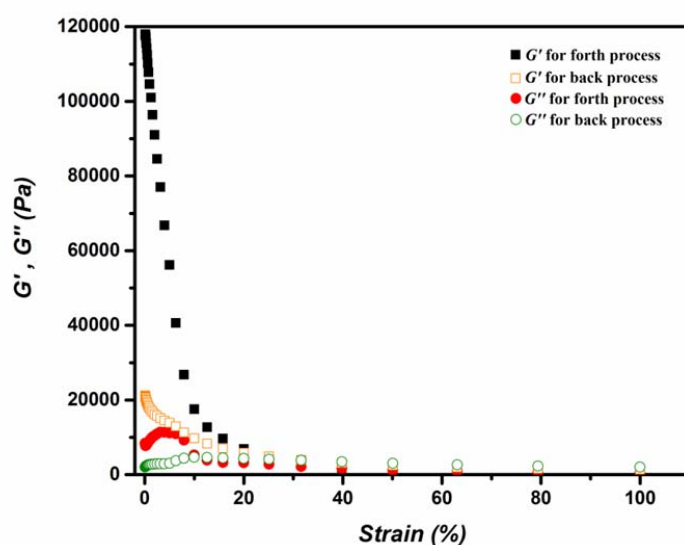

**Figure S9.** Rheology result of g-CN 2pre3h, storage ( $G'$ , black and orange squares) and loss modulus ( $G''$ , red and green circles) against strain, back (open) and forth (filled) process.

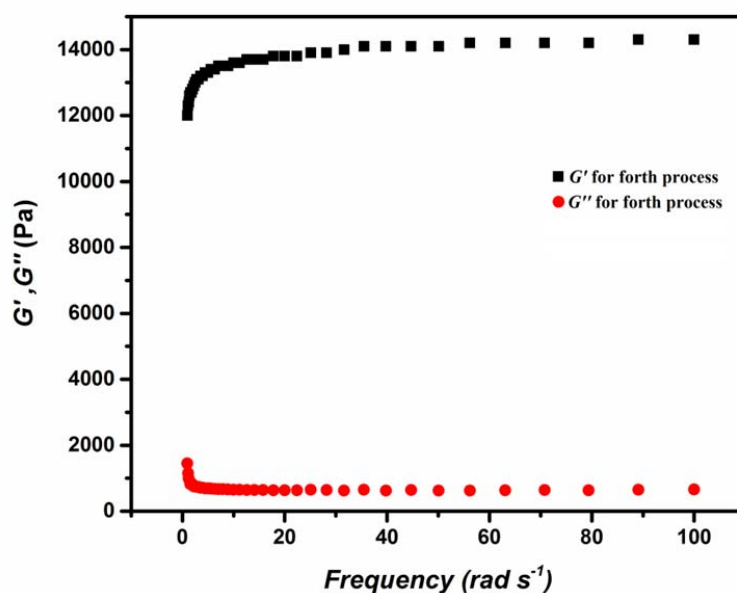

**Figure S10.** Rheology result of g-CN pre3h, storage ( $G'$ , black squares) and loss modulus ( $G''$ , red circles) against frequency.



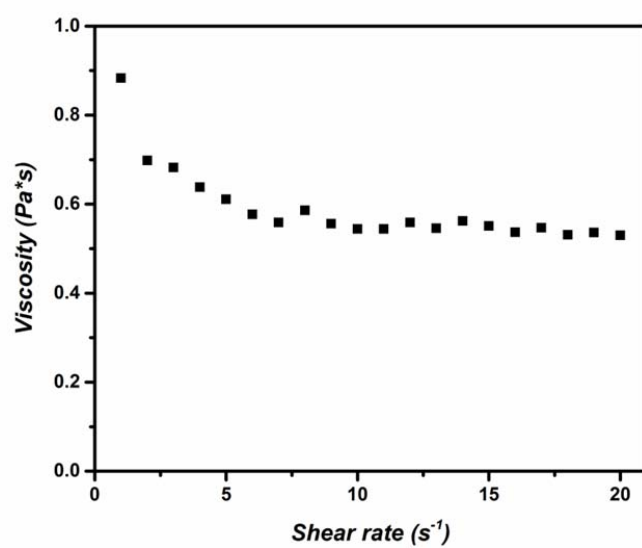

**Figure S11.** Viscosity profile of g-CN pre1h against shear rate between 1-20  $s^{-1}$ .

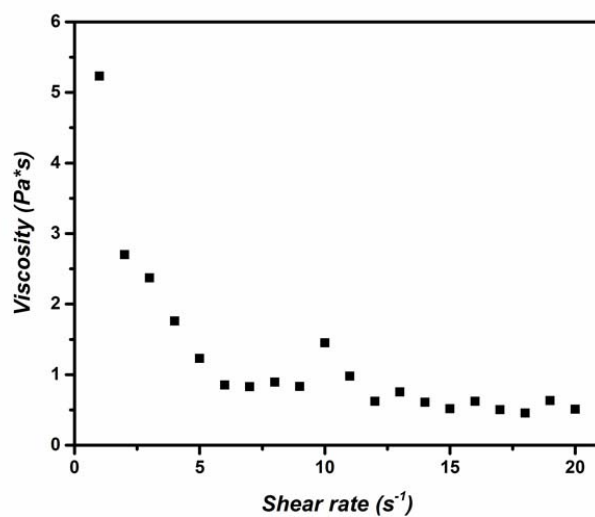

**Figure S12.** Viscosity profile of g-CN pre3h against shear rate between 1-20  $s^{-1}$ .

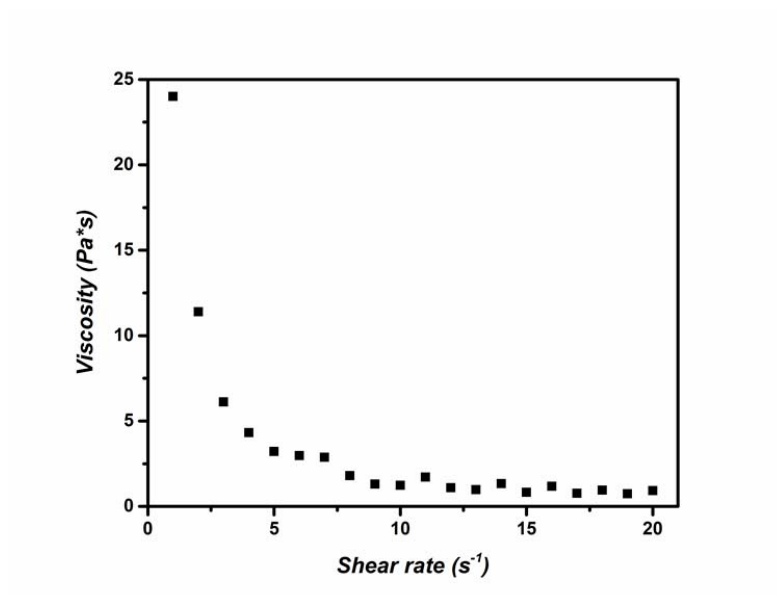

**Figure S13.** Viscosity profile of g-CN pre6h against shear rate between 1-20  $\text{s}^{-1}$ .

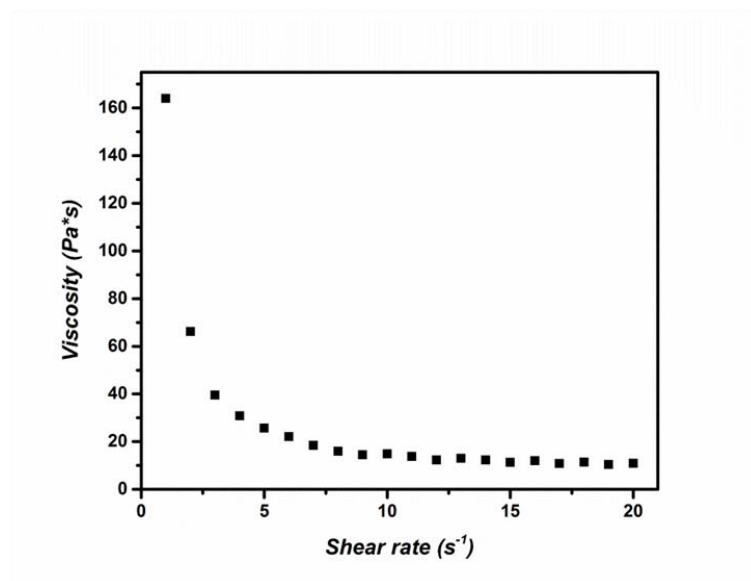

**Figure S14.** Viscosity profile of g-CN pre12h against shear rate between 1-20  $\text{s}^{-1}$ .

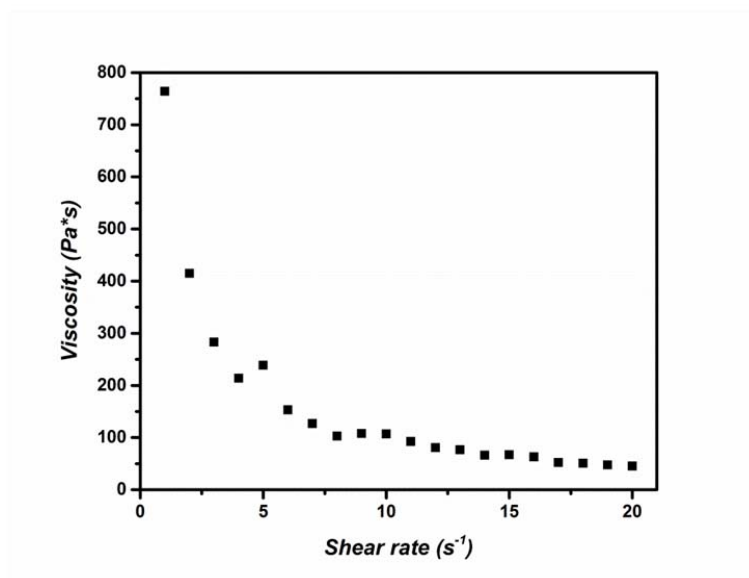

**Figure S15.** Viscosity profile of g-CN 2pre3h against shear rate between 1-20  $s^{-1}$ .

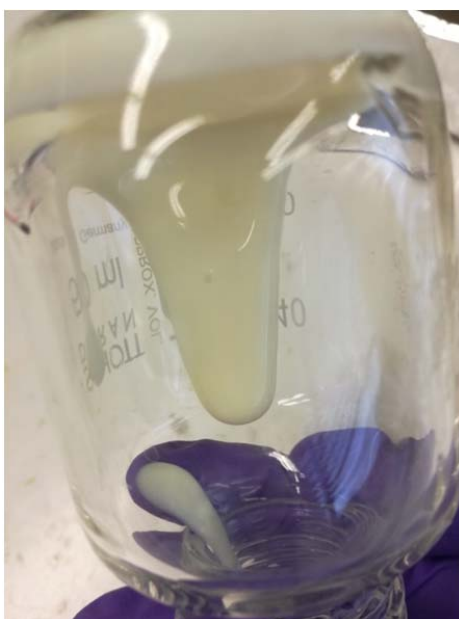

**Figure S16.** g-CN pre3h after standing still for 2 months.

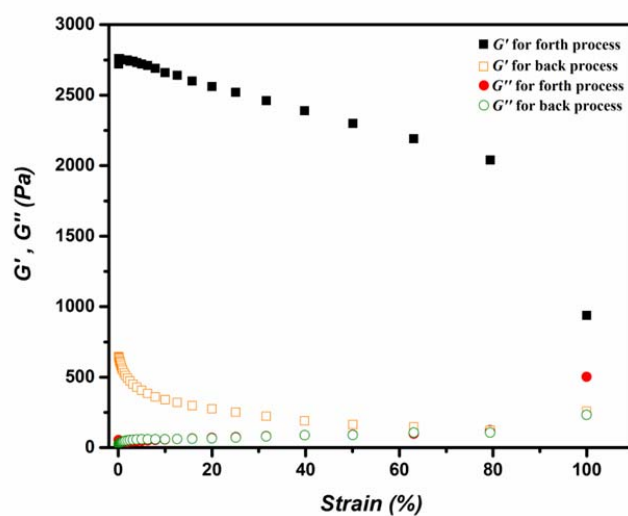

**Figure S17.** Rheology result of g-CN pre3h:water in 1:0.25 ratio, storage ( $G'$ , black and orange squares) and loss modulus ( $G''$ , red and green circles) against strain, back (open) and forth (filled) process.

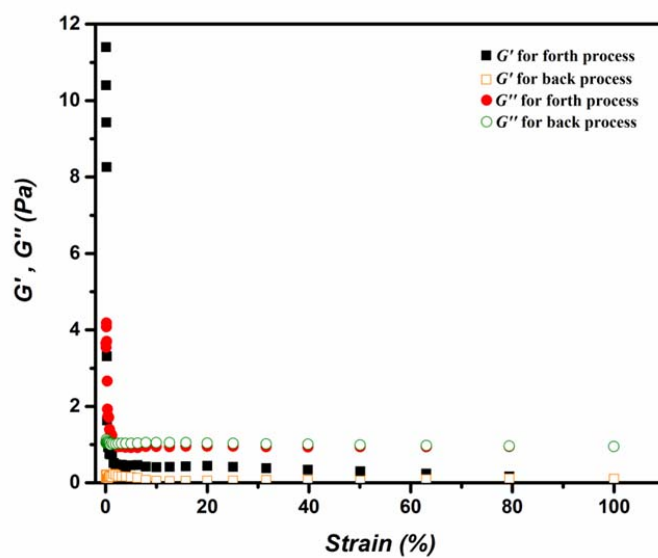

**Figure S18.** Rheology result of g-CN pre3h:water in 1:0.5 ratio, storage ( $G'$ , black and orange squares) and loss modulus ( $G''$ , red and green circles) against strain, back (open) and forth (filled) process.

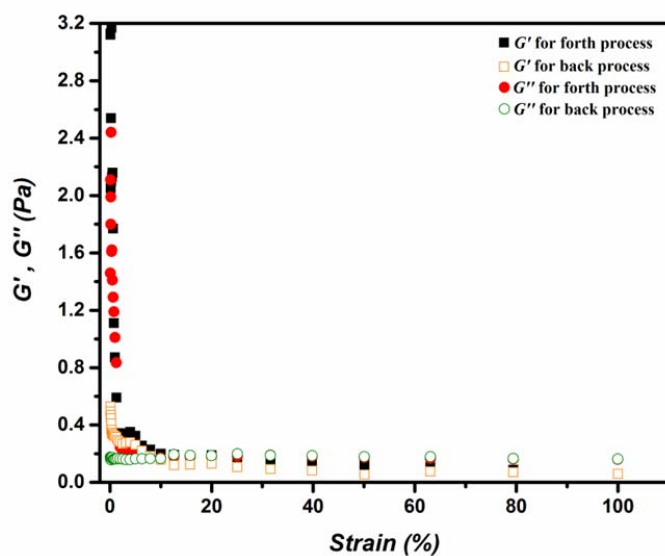

**Figure S19.** Rheology result of g-CN pre3h:water in 1:0.75 ratio, storage ( $G'$ , black and orange squares) and loss modulus ( $G''$ , red and green circles) against strain, back (open) and forth (filled) process.

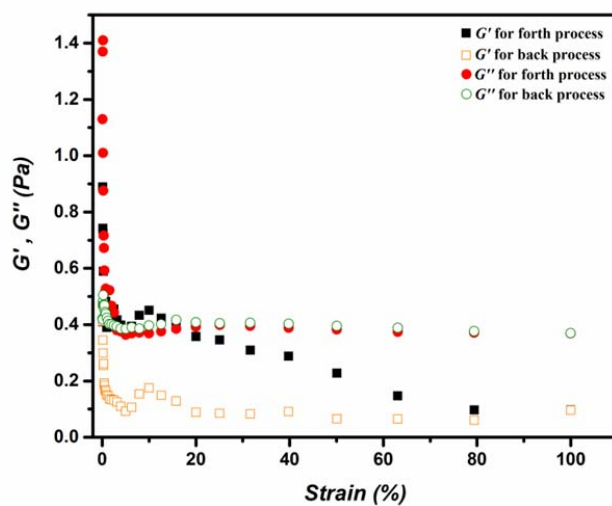

**Figure S20.** Rheology result of g-CN pre3h:water in 1:1 ratio, storage ( $G'$ , black and orange squares) and loss modulus ( $G''$ , red and green circles) against strain, back (open) and forth (filled) process.

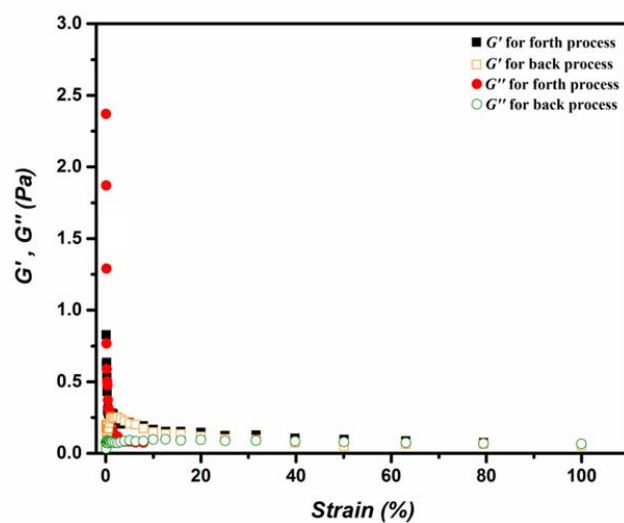

**Figure S21.** Rheology result of g-CN pre3h:water in 1:1.5 ratio, storage ( $G'$ , black and orange squares) and loss modulus ( $G''$ , red and green circles) against strain, back (open) and forth (filled) process.

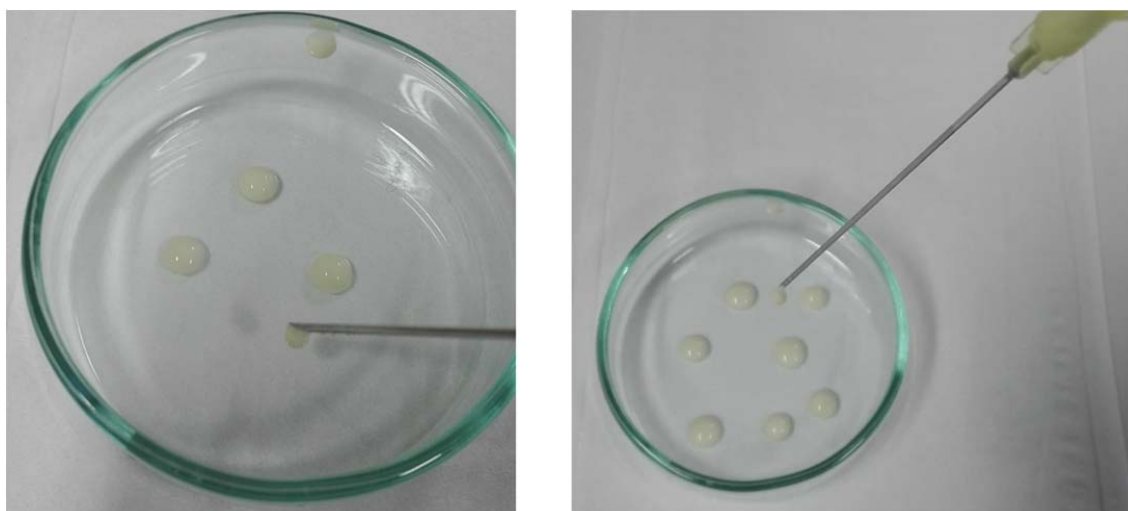

**Figure S22.** Image showing injection of g-CN pre3h through needle.

**Table S3.** Amounts of precursor, water, monomer and crosslinker for exemplary organohydrogel synthesis.

| Sample | Precursor (g-CN pre3h)<br>amount (wt.%) | Water<br>amount<br>(wt.%) | DMA<br>amount<br>(wt.%) | MBA<br>amount<br>(wt.%) |
|--------|-----------------------------------------|---------------------------|-------------------------|-------------------------|
| touA   | 25                                      | 25                        | 47.5                    | 2.5                     |
| touB   | 32.5                                    | 32.5                      | 32                      | 3                       |
| touC   | 22                                      | 38                        | 38                      | 2                       |
| touRef | 25 <sup>a</sup>                         | 25                        | 47.5                    | 2.5                     |

<sup>a</sup> Reference solution (450 mg EG, 450 mg water and 80 mg DMA) was utilized

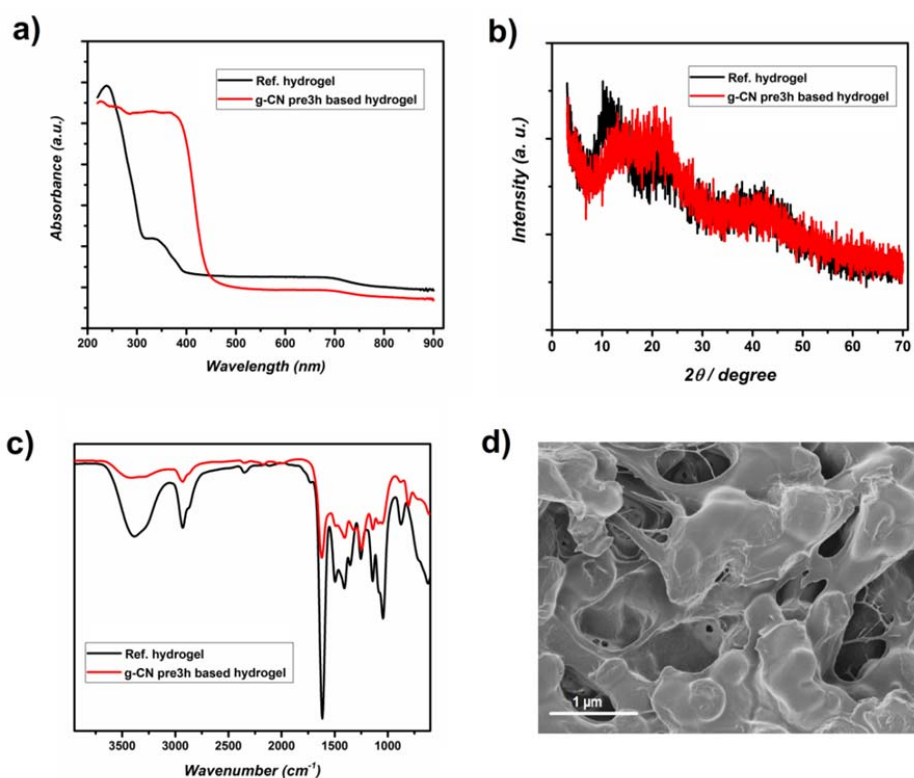

**Figure S23.** Solid state analysis of freeze dried reference and g-CN pre3h based tough hydrogel (touA) a) solid state UV spectra, b) powder XRD, c) FT-IR and d) SEM image of g-CN pre3h based tough hydrogel.

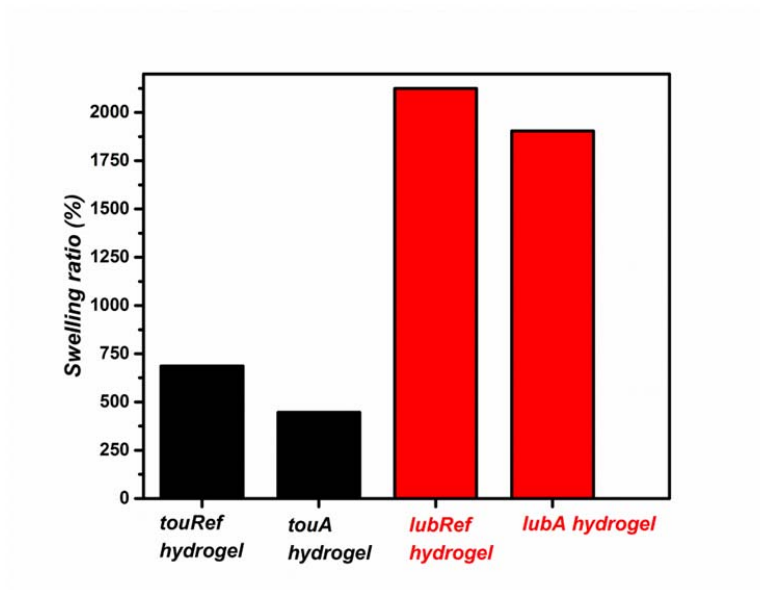

**Figure S24.** Swelling ratios of reference and g-CN pre3h based tough and lubricant hydrogels.

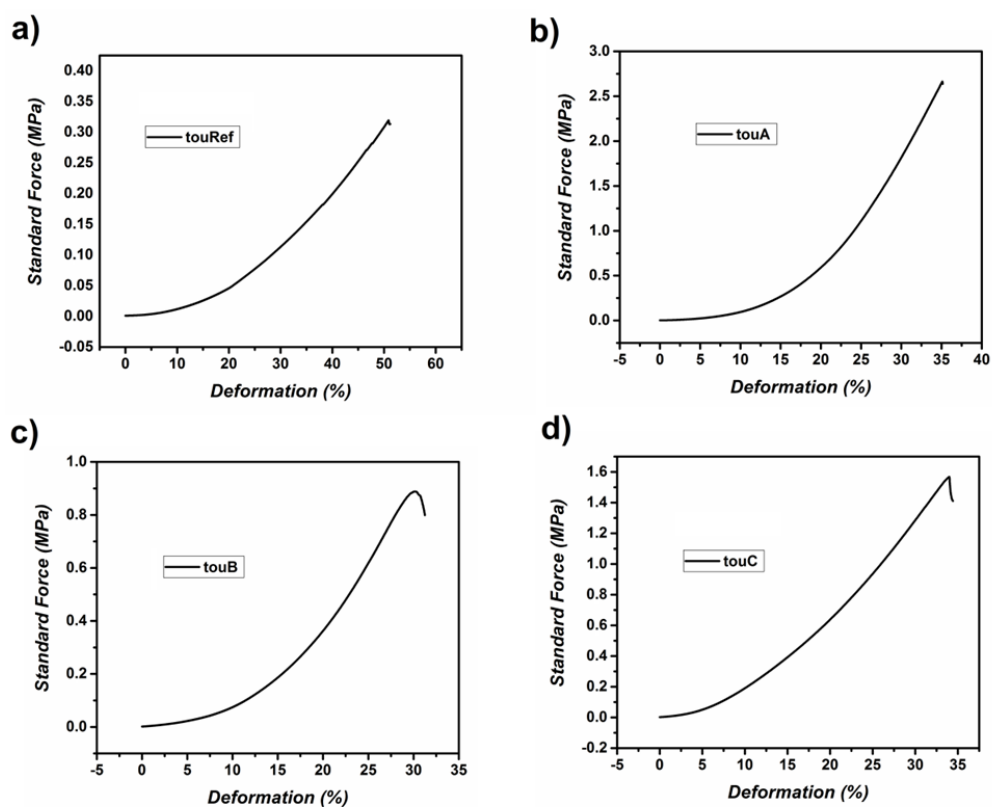

**Figure S25.** Compression profiles of a) touRef, b) touA, c) touB and d) touC organohydrogels.



**Table S4.** Elastic moduli values of tough organohydrogels and hydrogels.

| <b>Specimen</b>         | <b><math>E_{mod}</math> (-10% before break, MPa)</b> | <b>Compression (-10% before break, %)</b> | <b><math>E_{mod}</math> at break (MPa)</b> | <b>Compression at break (%)</b> | <b>Maximum stress (MPa)</b> |
|-------------------------|------------------------------------------------------|-------------------------------------------|--------------------------------------------|---------------------------------|-----------------------------|
| <b>tou Ref</b>          | 1.17                                                 | 34                                        | 1.51                                       | 44                              | 0.36                        |
| <b>touA</b>             | 11.9                                                 | 24                                        | 13.74                                      | 34                              | 2.67                        |
| <b>touB</b>             | 3.04                                                 | 20                                        | 4.29                                       | 30                              | 0.79                        |
| <b>touC</b>             | 6.01                                                 | 22                                        | 7.37                                       | 32                              | 1.51                        |
| <b>tou Ref hydrogel</b> | 0.94                                                 | 42                                        | 0.72                                       | 52                              | 0.14                        |
| <b>touA hydrogel</b>    | 9.94                                                 | 21                                        | 14.53                                      | 31                              | 2.36                        |
| <b>touB hydrogel</b>    | 4.40                                                 | 14                                        | 7.75                                       | 24                              | 1.07                        |
| <b>touC hydrogel</b>    | 0.51                                                 | 17                                        | 0.59                                       | 27                              | 0.12                        |

**Table S5.** Compositions of lubricant and blank hydrogels.

| <b>Sample</b> | <b>Precursor (g-CN pre3h) amount (wt.%)</b> | <b>Water amount (wt.%)</b> | <b>DMA amount (wt.%)</b> | <b>MBA amount (wt.%)</b> | <b>SPMA amount (wt.%)</b> |
|---------------|---------------------------------------------|----------------------------|--------------------------|--------------------------|---------------------------|
| <b>lubA</b>   | 20                                          | 40                         | 20                       | 1.5                      | 18.5                      |
| <b>lubB</b>   | 20                                          | 40                         | 38.5                     | 1.5                      | -                         |
| <b>lubC</b>   | 24                                          | 48                         | -                        | 1.8                      | 26.2 <sup>b</sup>         |
| <b>lubRef</b> | 20 <sup>a</sup>                             | 40                         | 20                       | 1.5                      | 18.5                      |

<sup>a</sup> Control solution used to synthesize reference organohydrogel, <sup>b</sup> limited to 1.2 g instead of 1.8 g due to solubility.

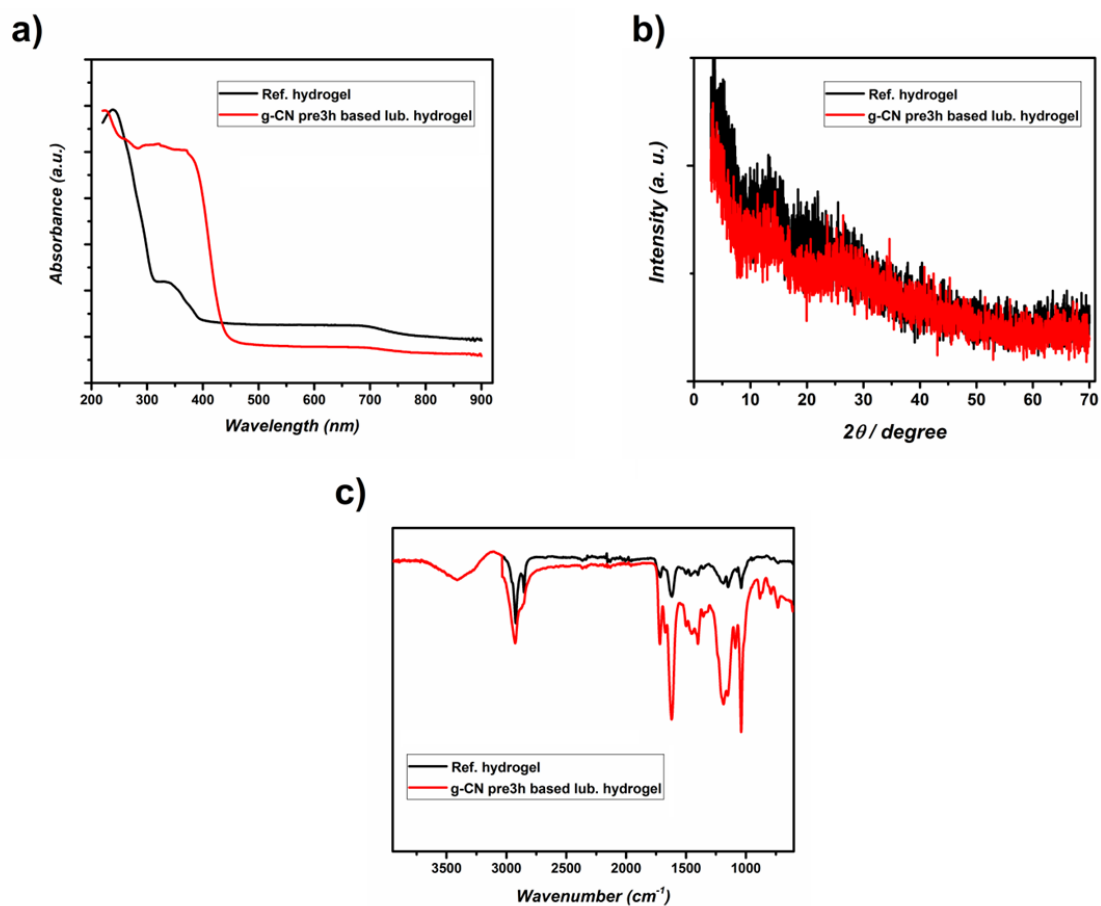

**Figure S26.** Solid state analysis of freeze dried reference and g-CN pre3h based lubricant hydrogel (lubA) a) solid state UV spectra, b) powder XRD and c) FT-IR spectra.

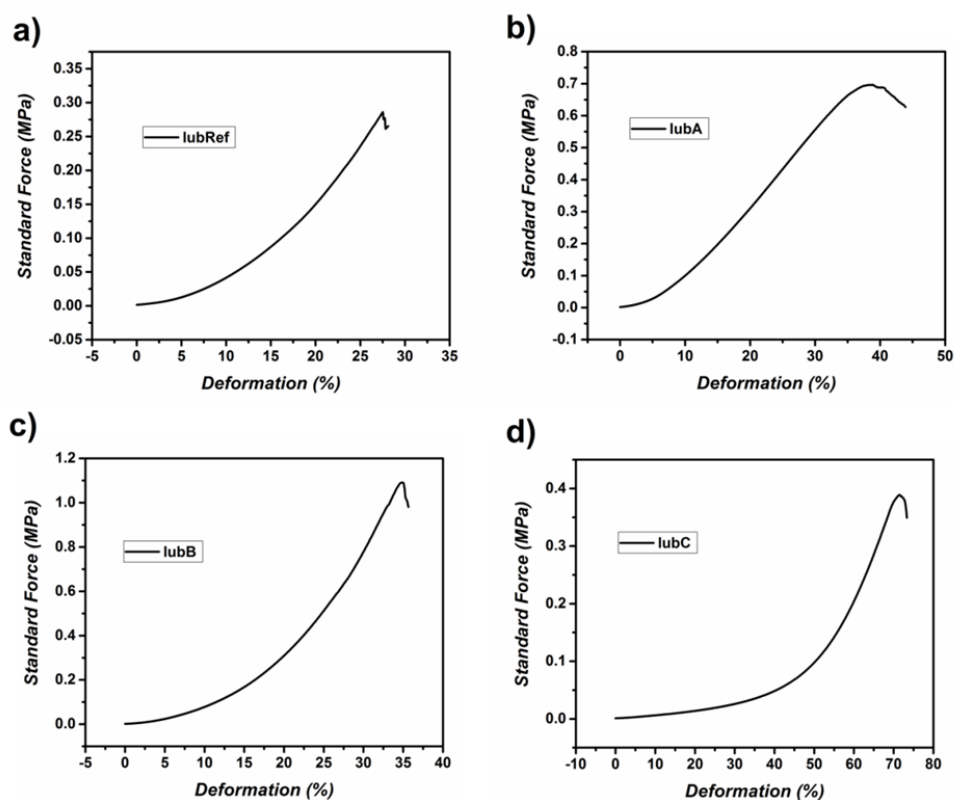

**Figure S27.** Compression profiles of a) lubRef, b) lubA, c) lubB and d) lubC organohydrogels.

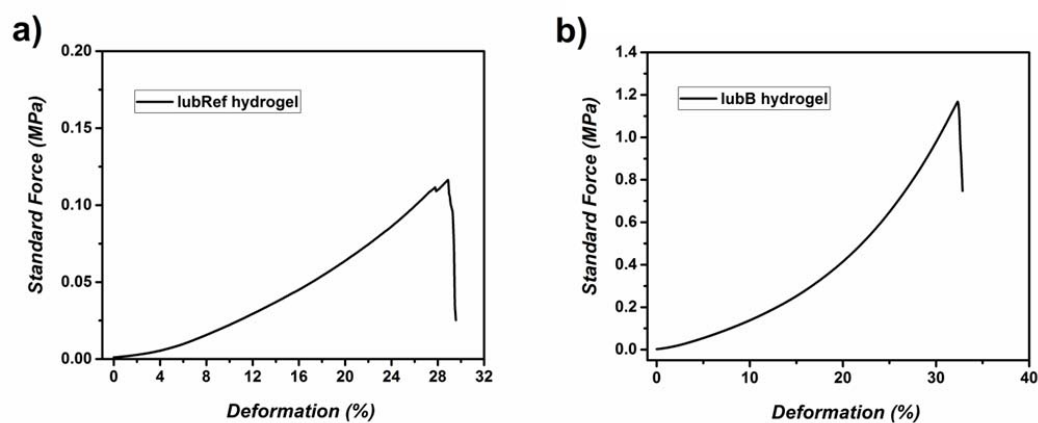

**Figure S28.** Compression profiles of a) lubRef and b) lubB hydrogels.

**Table S6.** Elastic moduli values of lubricant organohydrogels and hydrogels.

| <b>Specimen</b>             | <b><math>E_{mod}</math> (-10%<br/>before break,<br/>MPa)</b> | <b>Elongation (-<br/>10% before<br/>break, %)</b> | <b><math>E_{mod}</math> at break<br/>(MPa)</b> | <b>Elongation at<br/>break (%)</b> | <b>Maximum<br/>stress (MPa)</b> |
|-----------------------------|--------------------------------------------------------------|---------------------------------------------------|------------------------------------------------|------------------------------------|---------------------------------|
| <b>lub Ref</b>              | 0.66                                                         | 18                                                | 1.83                                           | 28                                 | 0.29                            |
| <b>lubA</b>                 | 2.52                                                         | 23                                                | 2.47                                           | 33                                 | 0.79                            |
| <b>lubB</b>                 | 3.10                                                         | 22                                                | 5.49                                           | 32                                 | 0.96                            |
| <b>lubC</b>                 | 1.27                                                         | 57                                                | 1.69                                           | 67                                 | 0.38                            |
| <b>lub Ref<br/>hydrogel</b> | 1.01                                                         | 19                                                | 1.68                                           | 29                                 | 0.30                            |
| <b>lubA<br/>hydrogel</b>    | 1.51                                                         | 3                                                 | 7.96                                           | 13                                 | 0.47                            |
| <b>lubB<br/>hydrogel</b>    | 4.75                                                         | 18                                                | 27.75                                          | 28                                 | 1.28                            |

**Video S1.** The video shows two hydrogel monoliths on an inclined plane. After a film of water is added one hydrogel does not move (lubB), while the other one (lubA) slides down.

**Video S2.** The video shows two hydrogel monoliths on an inclined plane. One hydrogel sticks to the plane (lubB), while the other one (lubA) slides down.

## References

1. Shalom, M.; Inal, S.; Fettkenhauer, C.; Neher, D.; Antonietti, M., Improving carbon nitride photocatalysis by supramolecular preorganization of monomers. *J. Am. Chem. Soc.* **2013**, *135* (19), 7118-21.
